# Supplementary material for: Cholesterol synthesis is essential for the growth of liver metastasis‐prone colorectal cancer cells
Source: PubMed Central journal article supplement — Cancer Sci. 2024 Sep 22;115(11):3817–28. doi: 10.1111/cas.16331 (PMC11531946; doi:10.1111/cas.16331), 2024-09-22
Supplement: CAS-115-3817-s001.pdf [file CAS-115-3817-s001.pdf]

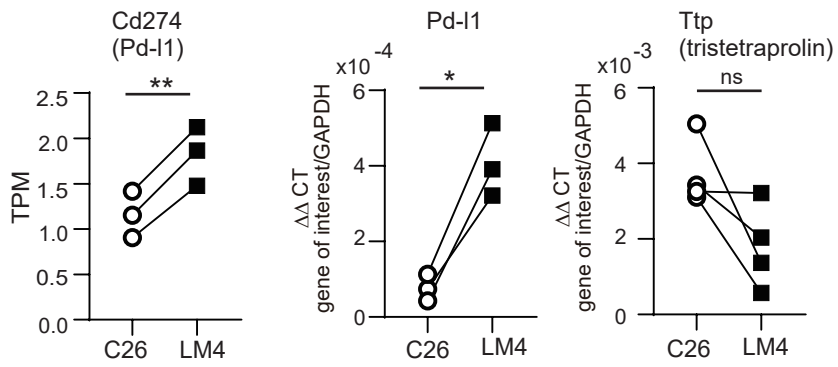

Supplementary FigureS3

Supplementary Figure S3. mRNA expression of Pd-I1, Ttp, and Ksrp in C26 and LM4 cells. mRNA expression analysis conducted via RNA sequencing (left graph) and qPCR (middle and right graphs). \*\* $p < 0.01$  and \* $p < 0.05$ ; t-test. ns = not significant. p-values: 0.0050 (Cd274, Pd-I1), 0.0176 (Pd-I1), and 0.0911 (Ttp) by paired t-test.
