# Supplementary material for: Cholesterol synthesis is essential for the growth of liver metastasis‐prone colorectal cancer cells
Source: PubMed Central journal article supplement — Cancer Sci. 2024 Sep 22;115(11):3817–28. doi: 10.1111/cas.16331 (PMC11531946; doi:10.1111/cas.16331), 2024-09-22
Supplement: CAS-115-3817-s002.pdf [file CAS-115-3817-s002.pdf]

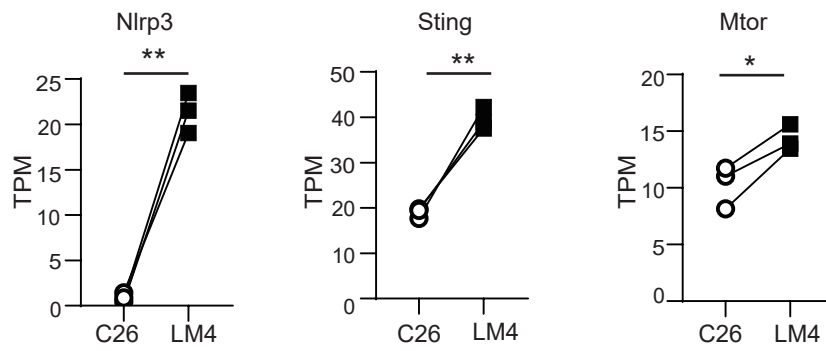

Supplementary FigureS2

Supplementary Figure S2. mRNA expression of Nlrp3, Sting, and mTOR in C26 and LM4 cells. Total RNA was extracted and analyzed via RNA sequencing. \*\* $p < 0.01$  and \* $p < 0.05$ ; t-test. ns = not significant.  $p = 0.0052$  (Nlrp3),  $0.0099$  (Sting), and  $0.0291$  (mTOR) by paired t-test.
