# Supplementary material for: Cholesterol synthesis is essential for the growth of liver metastasis‐prone colorectal cancer cells
Source: PubMed Central journal article supplement — Cancer Sci. 2024 Sep 22;115(11):3817–28. doi: 10.1111/cas.16331 (PMC11531946; doi:10.1111/cas.16331), 2024-09-22
Supplement: CAS-115-3817-s004.pdf [file CAS-115-3817-s004.pdf]

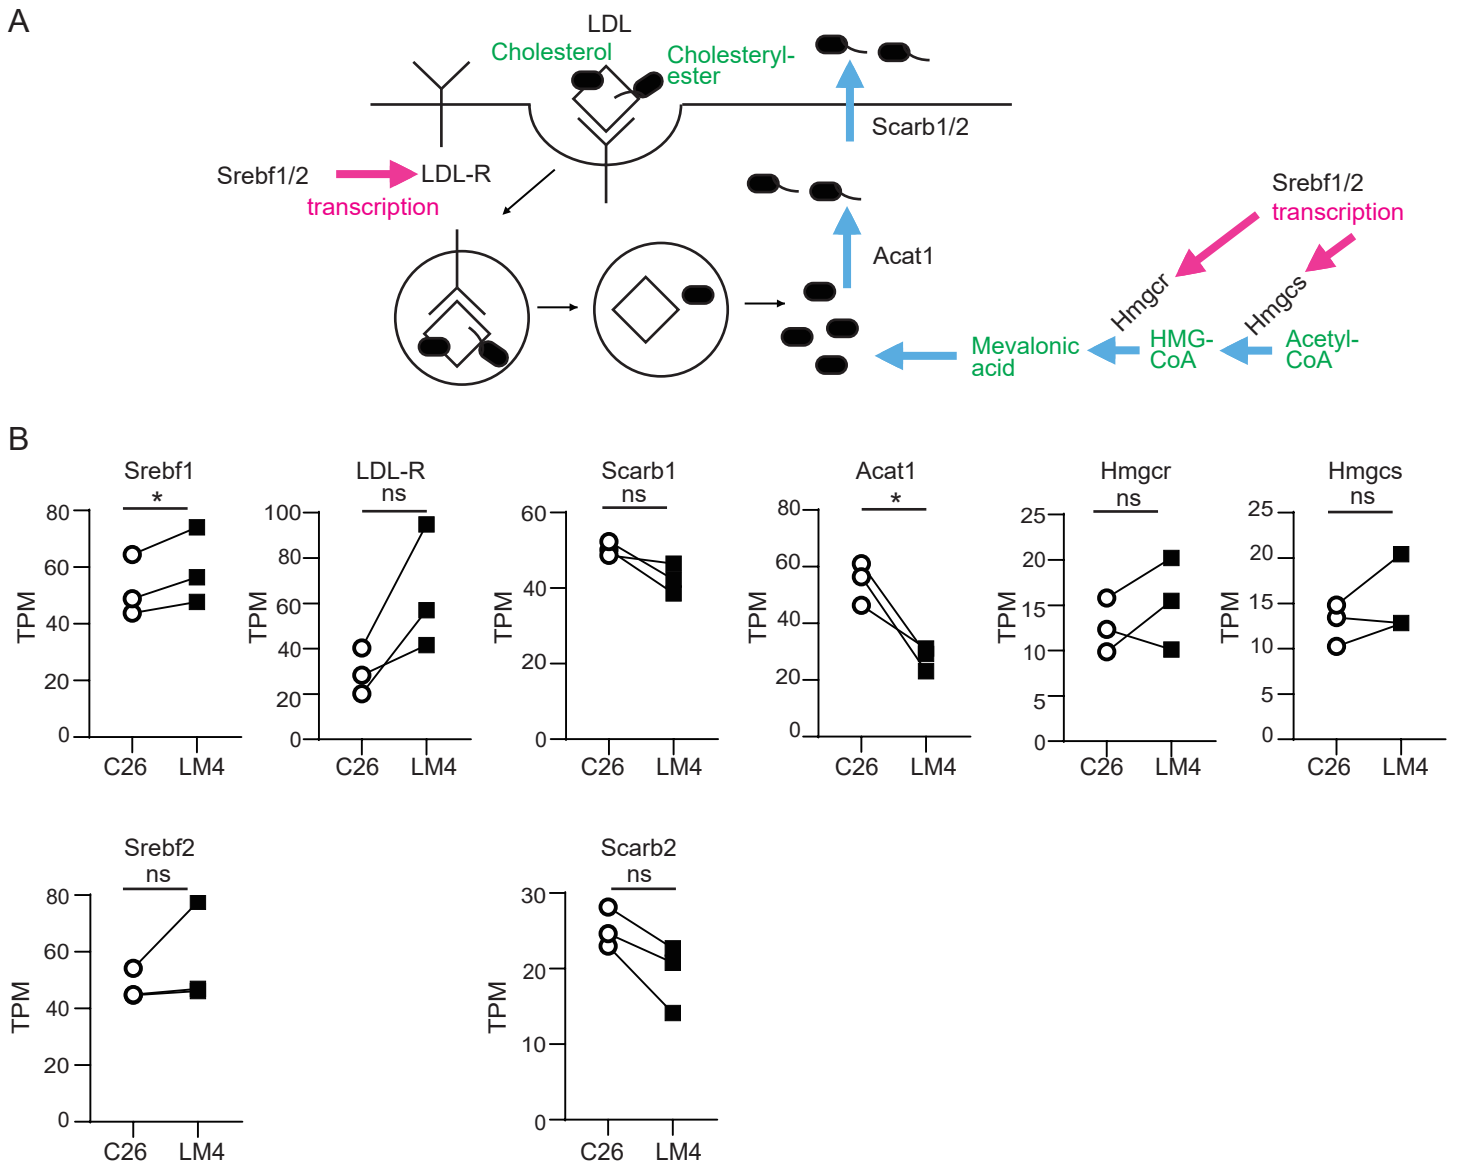

Supplementary FigureS1

Supplementary Figure S1. Cholesterol metabolism and gene expression of related proteins.

(A) Schematic depiction of cholesterol metabolism and dynamics in the cell. (B) Gene expression analysis using RNA sequencing, with expression levels shown as transcripts per million (TPM). \* $p < 0.05$ ; t-test. ns = not significant. p-values: 0.00499 (Srebf1), 0.3400 (Srebf2), 0.0998 (LDL-R), 0.1127 (Scarb1), 0.0540 (Scarb2), 0.0437 (Acat1), 0.3978 (Hmgcr), and 0.2968 (Hmgcs) by paired t-test.
